# Supplementary material
Source: Springer Nature journal article supplement (https://www.springermedizin.de/resource/supplementary/12936_2011_2083_MOESM6_ESM.pdf/9543368)

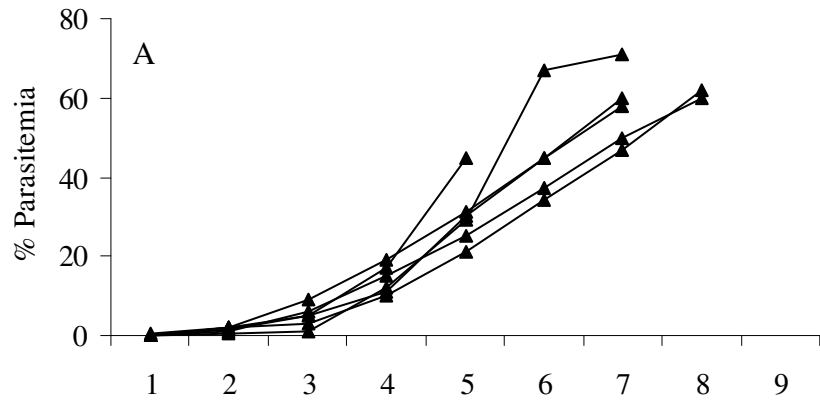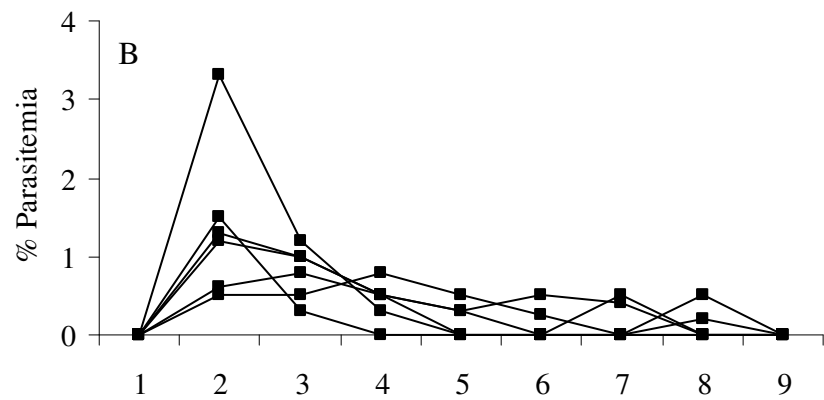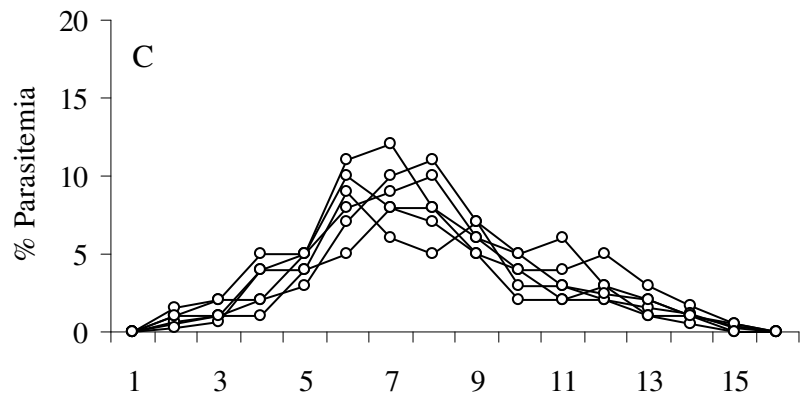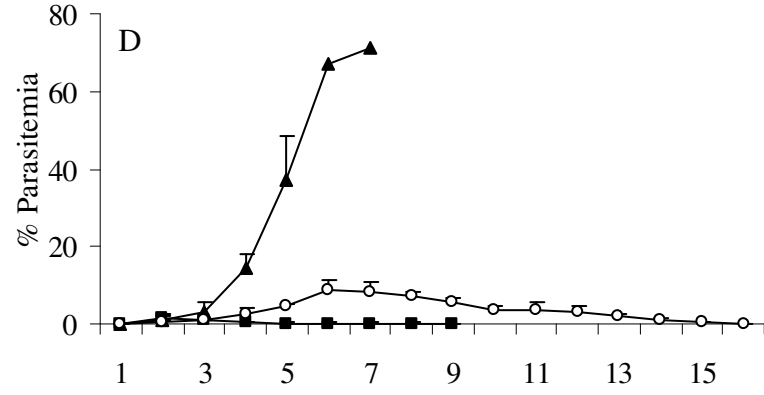

No. of days after parasite injection

Supplement: MOESM6 [file 9543368]
